# Supplementary material
Source: HighWire-hosted journal article supplement (https://jnnp.bmj.com/content/jnnp-2021-328185)
Supplement: inline-supplementary-material-1 [file inline-supplementary-material-1.pdf]

**Supplementary Table 1: Desikan-Killiany atlas region list**

| Left Hemisphere |              |                             | Right Hemisphere |              |                             |
|-----------------|--------------|-----------------------------|------------------|--------------|-----------------------------|
| ID              | Abbreviation | DK Region Name              | ID               | Abbreviation | DK Region Name              |
| 1               | L.BSTS       | ctx-lh-bankssts             | 43               | R.TH         | Right-Thalamus-Proper       |
| 2               | L.CACG       | ctx-lh-                     | 44               | R.CA         | Right-Caudate               |
| 3               | L.CMFG       | ctx-lh-caudalmiddlefrontal  | 45               | R.PU         | Right-Putamen               |
| 3               | L.CU         | ctx-lh-cuneus               | 46               | R.PA         | Right-Pallidum              |
| 4               | L.EC         | ctx-lh-entorhinal           | 47               | R.HI         | Right-Hippocampus           |
| 5               | L.FG         | ctx-lh-fusiform             | 48               | R.AM         | Right-Amygdala              |
| 6               | L.IPG        | ctx-lh-inferiorparietal     | 49               | R.AC         | Right-Accumbens-area        |
| 8               | L.ITG        | ctx-lh-inferiortemporal     | 50               | R.BSTS       | ctx-rh-bankssts             |
| 9               | L.ICG        | ctx-lh-isthmuscingulate     | 51               | R.CACG       | ctx-rh-                     |
| 10              | L.LOG        | ctx-lh-lateraloccipital     | 52               | R.CMFG       | ctx-rh-caudalmiddlefrontal  |
| 11              | L.LOFG       | ctx-lh-lateralorbitofrontal | 53               | R.CU         | ctx-rh-cuneus               |
| 12              | L.LG         | ctx-lh-lingual              | 54               | R.EC         | ctx-rh-entorhinal           |
| 13              | L.MOFG       | ctx-lh-medialorbitofrontal  | 55               | R.FG         | ctx-rh-fusiform             |
| 14              | L.MTG        | ctx-lh-middletemporal       | 56               | R.IPG        | ctx-rh-inferiorparietal     |
| 15              | L.PHIG       | ctx-lh-parahippocampal      | 57               | R.ITG        | ctx-rh-inferiortemporal     |
| 16              | L.PaCG       | ctx-lh-paracentral          | 58               | R.ICG        | ctx-rh-isthmuscingulate     |
| 17              | L.POP        | ctx-lh-parsopercularis      | 59               | R.LOG        | ctx-rh-lateraloccipital     |
| 18              | L.POR        | ctx-lh-parsorbitalis        | 60               | R.LOFG       | ctx-rh-lateralorbitofrontal |
| 19              | L.PTR        | ctx-lh-parstriangularis     | 61               | R.LG         | ctx-rh-lingual              |
| 20              | L.PCAL       | ctx-lh-pericalcarine        | 62               | R.MOFG       | ctx-rh-medialorbitofrontal  |
| 21              | L.PoCG       | ctx-lh-postcentral          | 63               | R.MTG        | ctx-rh-middletemporal       |
| 22              | L.PCG        | ctx-lh-posteriorcingulate   | 64               | R.PHIG       | ctx-rh-parahippocampal      |
| 23              | L.PrCG       | ctx-lh-precentral           | 65               | R.PaCG       | ctx-rh-paracentral          |
| 24              | L.PCU        | ctx-lh-precuneus            | 66               | R.POP        | ctx-rh-parsopercularis      |
| 25              | L.RACG       | ctx-lh-                     | 67               | R.POR        | ctx-rh-parsorbitalis        |
| 26              | L.RMFG       | ctx-lh-rostralmiddlefrontal | 68               | R.PTR        | ctx-rh-parstriangularis     |
| 27              | L.SFG        | ctx-lh-superiorfrontal      | 69               | R.PCAL       | ctx-rh-pericalcarine        |
| 28              | L.SPG        | ctx-lh-superiorparietal     | 70               | R.PoCG       | ctx-rh-postcentral          |
| 29              | L.STG        | ctx-lh-superiortemporal     | 71               | R.PCG        | ctx-rh-posteriorcingulate   |
| 30              | L.SMG        | ctx-lh-supramarginal        | 72               | R.PrCG       | ctx-rh-precentral           |
| 31              | L.FP         | ctx-lh-frontalpole          | 73               | R.PCU        | ctx-rh-precuneus            |
| 32              | L.TP         | ctx-lh-temporalpole         | 74               | R.RACG       | ctx-rh-                     |
| 33              | L.TTG        | ctx-lh-transversetemporal   | 75               | R.RMFG       | ctx-rh-rostralmiddlefrontal |
| 34              | L.IN         | ctx-lh-insula               | 76               | R.SFG        | ctx-rh-superiorfrontal      |
| 35              | L.CER        | Left-Cerebellum-Cortex      | 77               | R.SPG        | ctx-rh-superiorparietal     |
| 36              | L.TH         | Left-Thalamus-Proper        | 78               | R.STG        | ctx-rh-superiortemporal     |
| 37              | L.CA         | Left-Caudate                | 79               | R.SMG        | ctx-rh-supramarginal        |
| 38              | L.PU         | Left-Putamen                | 80               | R.FP         | ctx-rh-frontalpole          |
| 39              | L.PA         | Left-Pallidum               | 81               | R.TP         | ctx-rh-temporalpole         |
| 40              | L.HI         | Left-Hippocampus            | 82               | R.TTG        | ctx-rh-transversetemporal   |
| 41              | L.AM         | Left-Amygdala               | 83               | R.IN         | ctx-rh-insula               |
| 42              | L.AC         | Left-Accumbens-area         | 84               | R.CER        | Right-Cerebellum-Cortex     |

DK = Desikan-Killiany atlas, ctx = cortex, lh = left hemisphere, rh = right hemisphere
